# Supplementary material for: Very Long-term Survival Following Resection for Pancreatic Cancer Is Not Explained by Commonly Mutated Genes: Results of Whole-Exome Sequencing Analysis
Source: Oxford University Press journal article supplement (doi:10.1158/1078-0432.ccr-14-2600), 2015-01-26
Supplement: 10780432ccr142600-sup-138373_1_supp_2787888_ngqq17.xlsx [file 10780432ccr142600-sup-138373_1_supp_2787888_ngqq17.xlsx]

## Sheet: Sheet1
Supplementary Table 3. Somatic mutations in targeted sequencing from Validation Set
	Tumor Sample	Gene	Mutation	Amino Acid	Mutation Type^
	VLTS-9	GNAS	c.601G>T	p.R201S	SBS
	VLTS-9	KRAS	c.35G>T	p.G12V	SBS
	VLTS-9	SMAD4	c.1124insAG	p.A375fs	INS
	VLTS-10	KRAS	c.35G>T	p.G12V	SBS
	VLTS-11	KRAS	c.35G>T	p.G12V	SBS
	VLTS-11	SMAD4	c.984G>T	p.Y328X	SBS
	VLTS-12	KRAS	c.34G>C	p.G12R	SBS
	VLTS-13	KRAS	c.35G>A	p.G12D	SBS
	VLTS-14	KRAS	c.34G>C	p.G12R	SBS
	VLTS-14	TP53	c.1009C>T	p.R337C	SBS
	VLTS-15	KRAS	c.35G>A	p.G12D	SBS
	VLTS-16	KRAS	c.35G>T	p.G12V	SBS
	VLTS-16	TP53	c.844G>A	p.R282W	SBS
	VLTS-17	CDKN2A	c.442C>T	p.A148T	SBS
	VLTS-17	KRAS	c.35G>T	p.G12V	SBS
	VLTS-17	TP53	c.818C>T	p.R273H	SBS
	VLTS-18	CDKN2A	c.101delG	p.A34fs	DEL
	VLTS-18	KRAS	c.35G>A	p.G12D	SBS
	VLTS-18	TP53	c.746G>A	p.R249K	SBS
	VLTS-19	BRAF	c.1799A>T	p.V600E	SBS
	VLTS-19	KRAS	c.34G>C	p.G12R	SBS
	VLTS-19	TP53	c.820C>A	p.V274F	SBS
	VLTS-20	KRAS	c.35G>T	p.G12V	SBS
	VLTS-20	TP53	c.743delGG	p.R248fs	DEL
	VLTS-21	KRAS	c.35G>T	p.G12V	SBS
	VLTS-21	TP53	c.742C>T	p.R248W	SBS
	VLTS-22	KRAS	c.35G>T	p.G12V	SBS
	VLTS-22	SMAD4	c.284T>C	p.Y95C	SBS
	VLTS-22	TP53	c.734G>A	p.G245D	SBS
	VLTS-23	CDKN2A	c.29delT	p.E10fs	DEL
	VLTS-23	KRAS	c.35G>A	p.G12D	SBS
	VLTS-23	RNF43	c.804delT	p.S268fs	DEL
	VLTS-23	SMAD4	c.665insC	p.T222fs	INS
	VLTS-23	TP53	c.734G>A	p.G245D	SBS
	VLTS-24	KRAS	c.34G>T	p.G12C	SBS
	VLTS-24	TP53	c.526A>C	p.C176G	SBS
	VLTS-24	KRAS	c.35G>T	p.G12V	SBS
	VLTS-25	TP53	c.584A>G	p.I195T	SBS
	VLTS-26	CDKN2A	g.21970900C>G	splice site	SBS
	VLTS-26	KRAS	c.35G>A	p.G12D	SBS
	VLTS-26	SMAD4	c.1028G>T	p.S343X	SBS
	VLTS-26	TP53	c.637G>A	p.R213X	SBS
	VLTS-27	KRAS	c.34G>C	p.G12R	SBS
	VLTS-27	TP53	c.880C>A	p.E294X	SBS
	VLTS-28	KRAS	c.35G>T	p.G12V	SBS
	VLTS-29	KRAS	c.35G>T	p.G12V	SBS
	VLTS-30	KRAS	c.35G>T	p.G12V	SBS
	VLTS-30	TP53	c.733C>T	p.G245S	SBS
	VLTS-31	KRAS	c.35G>A	p.G12D	SBS
	VLTS-32	KRAS	c.35G>T	p.G12V	SBS
	VLTS-32	SMAD4	c.747G>C	p.Q249H	SBS
	VLTS-32	TP53	c.493C>T	p.Q165X	SBS
	VLTS-33	KRAS	c.35G>T	p.G12V	SBS
	VLTS-33	SMAD4	c.216delA	p.V72fs	DEL
	VLTS-33	TP53	c.556C>T	p.D186N	SBS
	VLTS-34	KRAS	c.183T>G	p.Q61H	SBS
	VLTS-34	SMAD4	c.988C>A	p.E330X	SBS
	VLTS-34	TP53	c.1024C>T	p.R342X	SBS
	VLTS-35	KRAS	c.34G>C	p.G12R	SBS
	VLTS-35	TP53	c.698T>G	p.H233P	SBS
	^SBS: nonsynonymous single-base substitution; INS: insertion; DEL: deletion
